# Supplementary material for: The Study on Mechanism of Discriminatory Perception on Online Aggressive Behaviors of Migrant Children—An Analysis of The Mediating Effect of Social Alienation and The Moderating Effect of Parental Emotional Warmth
Source: Research Square preprint supplement (doi:10.21203/rs.3.rs-8069779/v1), 2025-12-16
Supplement: Supplementary file 1 [file 2adc56f0d9b2461fab570fc4.docx]

### Questionnaire on Online Aggression Behaviors of High School Students Who Are Migrant Workers' Children in Jinan

#### **Part 1: Basic Information**

1. Gender (□ Male □ Female)
2. Are you an only child? (□ Yes □ No)
3. Are you from a single-parent family? (□ Yes □ No)
4. Your household registration type: ( )

A. Urban household registration within Shandong Province

B. Rural household registration within Shandong Province

C. Urban household registration outside Shandong Province

D. Rural household registration outside Shandong Province

1. How long have you lived and studied in the city? ( )

A. Less than 1 year

B. 1–4 years

C. 4–7 years

D. More than 7 years

1. Name of your school (fill in the blank): ________
2. Current grade ( )

A. Grade 10 B. Grade 11 C. Grade 12

1. Your political affiliation ( )

A. Mass public

B. Communist Party Member

C. Communist Youth League Member

D. Democratic Party Member

E.else

1. Father’s education level ( )

A. Primary school or below

B. Junior high school

C. Senior high school

D. Junior college

E. Bachelor’s degree or above

1. Mother’s education level ( )

A. Primary school or below

B. Junior high school

C. Senior high school

D. Junior college

E. Bachelor’s degree or above

1. Father’s current occupation ( )

A. Transportation industry

B. Catering industry

C. Construction industry

D. Express delivery industry

E. Housekeeping industry

F. Manufacturing industry

G. else

1. Mother’s current occupation ( )

A. Transportation industry

B. Catering industry

C. Construction industry

D. Express delivery industry

E. Housekeeping industry

F. Manufacturing industry

G. else

#### **Part 2: Perceived Discrimination Questionnaire**

For each statement, select your level of agreement:

(A. Strongly Disagree B. Disagree C. Neutral D. Agree E. Strongly Agree)

1. Classmates think I am not smart because I am from a rural area and are unwilling to play with me. ( )
2. Teachers think I have a weak foundation, so they don’t think of me when asking questions. ( )
3. I respond slowly, and teachers are impatient when explaining questions to me. ( )
4. Teachers assign better seats to top-performing classmates from urban areas. ( )
5. Teachers select top-performing classmates from urban areas as class cadres. ( )
6. Teachers do not assign dirty or tiring work to students from urban areas. ( )
7. Teachers prefer good-looking classmates over me. ( )
8. Classmates laugh at my figure, look at me strangely, or even give me nicknames. ( )
9. Classmates are unwilling to play with me because I have few clothes to change. ( )
10. Teachers rarely notice me because I dress plainly. ( )
11. Teachers rarely ask me questions because I have an accent when speaking. ( )
12. Teachers interrupt me before I finish speaking and express their own opinions. ( )
13. Classmates from better-off families get seats closer to the front. ( )
14. Teachers favor classmates from better-off families. ( )
15. Classmates make fun of my parents being migrant workers. ( )
16. Classmates look down on my family background because my parents are farmers. ( )
17. Teachers dislike me because they look down on my parents’ jobs. ( )

#### **Part 3: Social Alienation Questionnaire**

For each statement, select your level of agreement:

(A. Strongly Disagree B. Disagree C. Neutral D. Agree E. Strongly Agree)

1. I often experience a sense of powerlessness. ( )
2. My ideals and wishes are inconsistent with reality. ( )
3. I often feel forced to do things I don’t want to do. ( )
4. Things are changing so fast nowadays that I often struggle to choose which norms to follow. ( )
5. When in trouble, I cannot rely on collective or organizational support. ( )
6. My life is relatively monotonous and boring. ( )
7. I have a sense of self-disgust. ( )
8. I like myself. ( )
9. I have a positive attitude toward myself. ( )
10. I feel I am a good person. ( )
11. Overall, I am satisfied with myself. ( )
12. I feel alienated from myself. ( )
13. The daily stressful life makes me feel depressed. ( )
14. I feel my freedom is restricted by something. ( )
15. I feel forced by something. ( )
16. I feel my life lacks fulfillment. ( )
17. I often experience a sense of tension and oppression. ( )
18. I feel great mental pressure. ( )
19. Things change so quickly that I cannot grasp them. ( )
20. I feel I cannot control many things. ( )
21. I always feel like a failure. ( )
22. There are so many different ideas now that I cannot determine which one to believe in. ( )
23. I feel powerless about many things. ( )
24. I feel my life has no clear goal. ( )

#### **Part 4: Parental Emotional Warmth Questionnaire**

For each statement, select your level of agreement:

(A. Strongly Disagree B. Disagree C. Neutral D. Agree E. Strongly Agree)

1. I feel my parent(s) try to make my adolescence more meaningful and colorful. ( )
2. When I encounter setbacks, I can feel my parent(s) trying to encourage and comfort me. ( )
3. My parent(s) always try to encourage me to be outstanding. ( )
4. My parent(s) praise me. ( )
5. I feel a warm, considerate, and intimate connection with my parent(s). ( )
6. When I succeed in something, I feel my parent(s) are proud of me. ( )
7. I can tell my parent(s) likes me through their words and expressions. ( )

#### **Part 5: Online Aggression Behavior Questionnaire**

For each statement, select your level of agreement:

(A. Strongly Disagree B. Disagree C. Neutral D. Agree E. Strongly Agree)

1. I often insult or attack people I dislike online, even if they haven’t provoked me. ( )
2. I will intentionally leak private information about people I hate online. ( )
3. I have initiated or participated in human flesh searches (online personal information searches) of strangers. ( )
4. If someone expresses an opinion I disagree with online, I will criticize them sharply. ( )
5. If someone speaks ill of me online, I will respond in the same way. ( )
6. If someone belittles or insults me in games, I will definitely retaliate. ( )
7. On social platforms (e.g., QQ Space, Moments, Weibo), if my opinions are opposed by many people, I will argue with them or even insult others. ( )
